# Supplementary figures and images for: Effects of dating errors on nonparametric trend analyses of speleothem time series
Source: Copernicus journal article supplement (doi:10.5194/cp-8-1637-2012), 2012-10-23

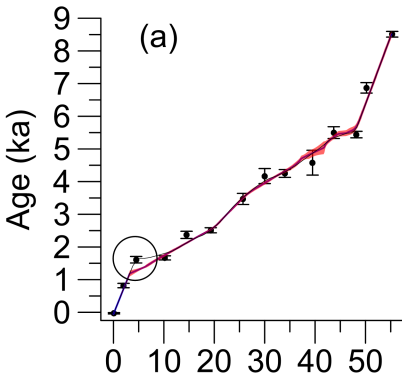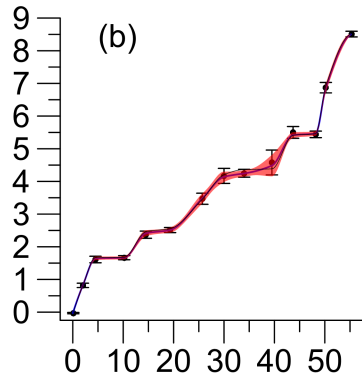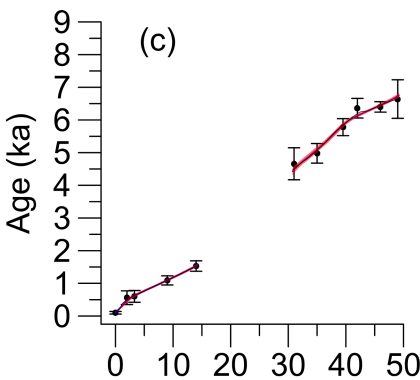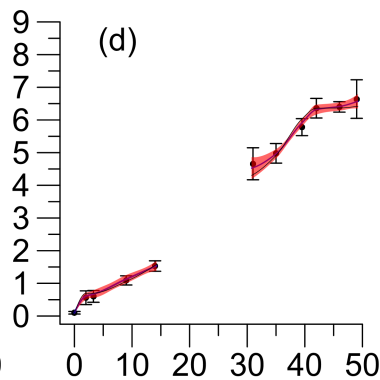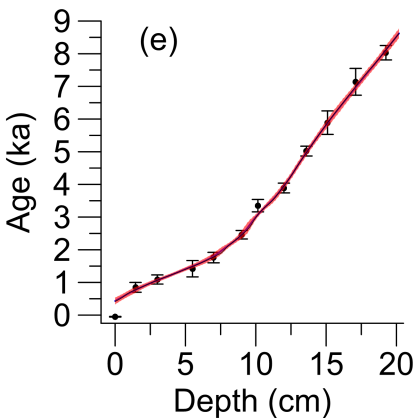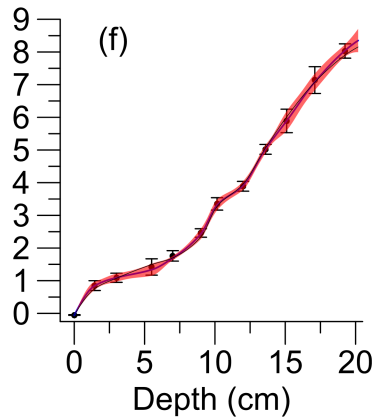

Supplement: Supplementary file 1 [file cpd-2012-0060-f01-highres.pdf › cpd-2012-0060-f01-highres.pdf]

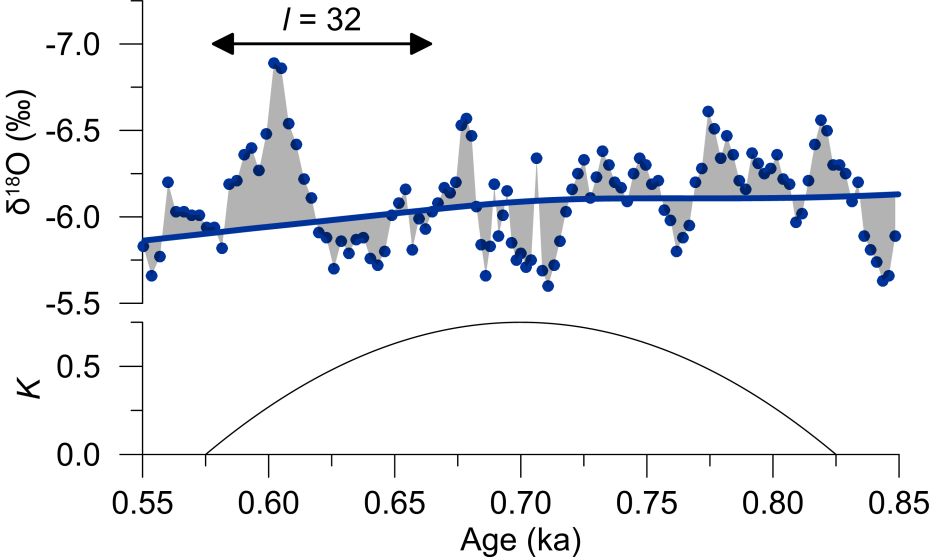

Supplement: Supplementary file 2 [file cpd-2012-0060-f02-highres.pdf › cpd-2012-0060-f02-highres.pdf]

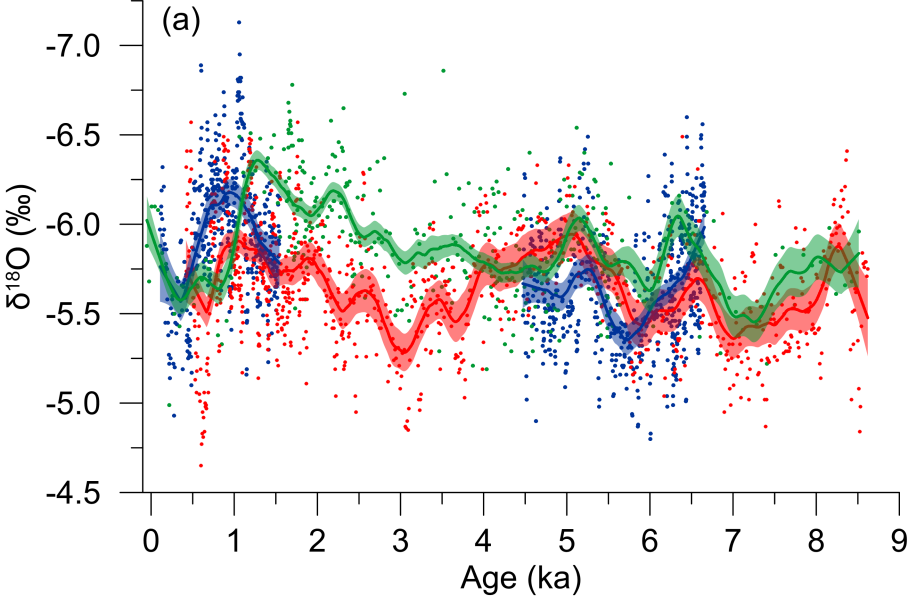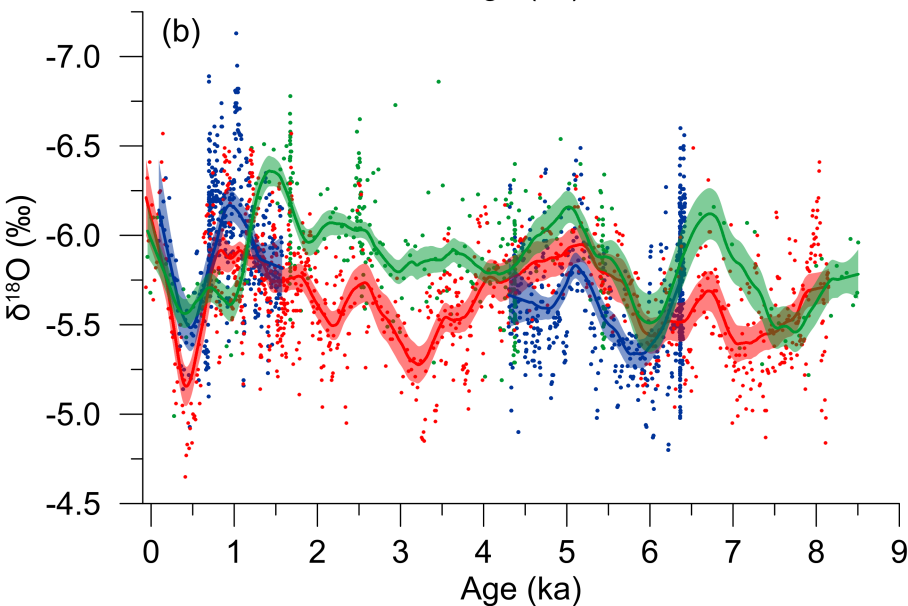

Supplement: Supplementary file 3 [file cpd-2012-0060-f04-highres.pdf › cpd-2012-0060-f04-highres.pdf]

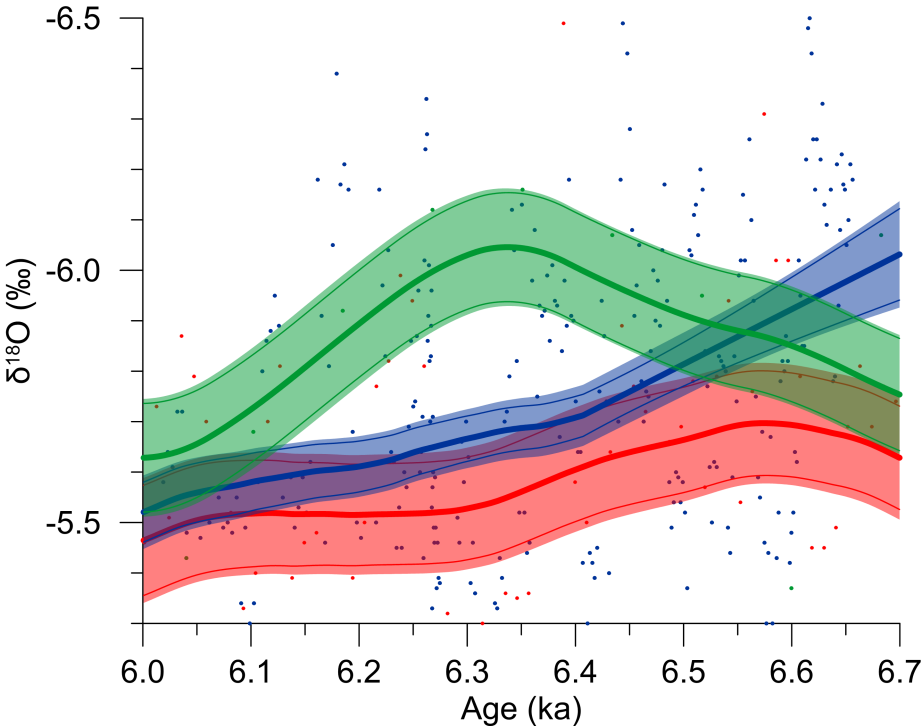

Supplement: Supplementary file 4 [file cpd-2012-0060-f05-highres.pdf › cpd-2012-0060-f05-highres.pdf]

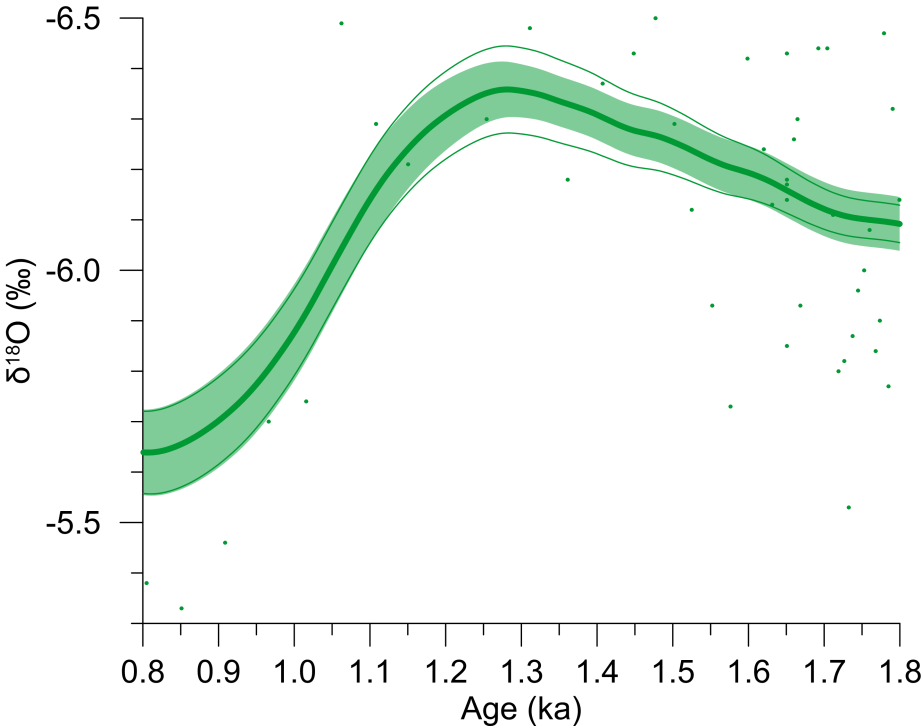

Supplement: Supplementary file 5 [file cpd-2012-0060-f06-highres.pdf › cpd-2012-0060-f06-highres.pdf]

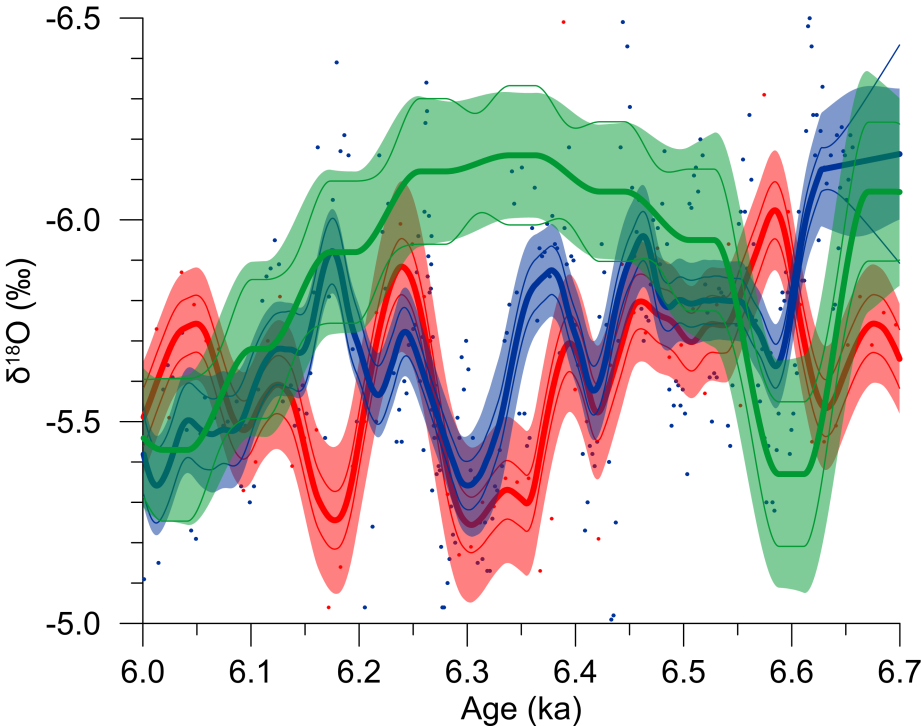

Supplement: Supplementary file 6 [file cpd-2012-0060-f07-highres.pdf › cpd-2012-0060-f07-highres.pdf]

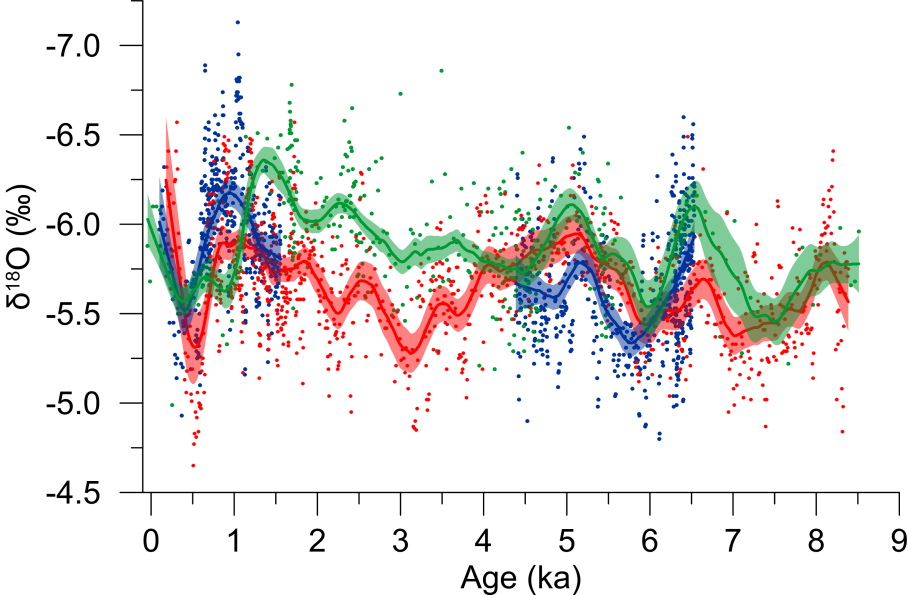

Supplement: Supplementary file 7 [file cpd-2012-0060-f08-highres.pdf › cpd-2012-0060-f08-highres.pdf]
